# Supplementary material for: Composition and strain engineered AgNbO3-based multilayer capacitors for ultra-high energy storage capacity
Source: Royal Society of Chemistry journal article supplement (doi:10.1039/d1ta00973g), 2021-01-01
Supplement: d1ta00973g1.pdf [file d1ta00973g1.pdf]

# Composition and strain engineered $\text{AgNbO}_3$ -based multilayer capacitors for ultra-high energy storage capacity

Li-Feng Zhu<sup>1,2</sup>, Lei Zhao<sup>3</sup>, Yongke Yan<sup>\*1</sup>, Haoyang Leng<sup>1</sup>, Xiaotian Li<sup>1</sup>, Li-Qian Cheng<sup>1</sup>, Xiangming Xiong<sup>4</sup>, Shashank Priya<sup>\*1</sup>

<sup>1</sup> Department of Materials Science and Engineering, Pennsylvania State University, University Park, PA 16802, United States

<sup>2</sup> School of Materials Science and Engineering, University of Science and Technology Beijing, Beijing 100083, China.

<sup>3</sup> College Physics Science & Technology, Hebei University, Baoding 071002, China

4. The Program in Applied and Computational Mathematics, Princeton University, Princeton, NJ 08544, United States

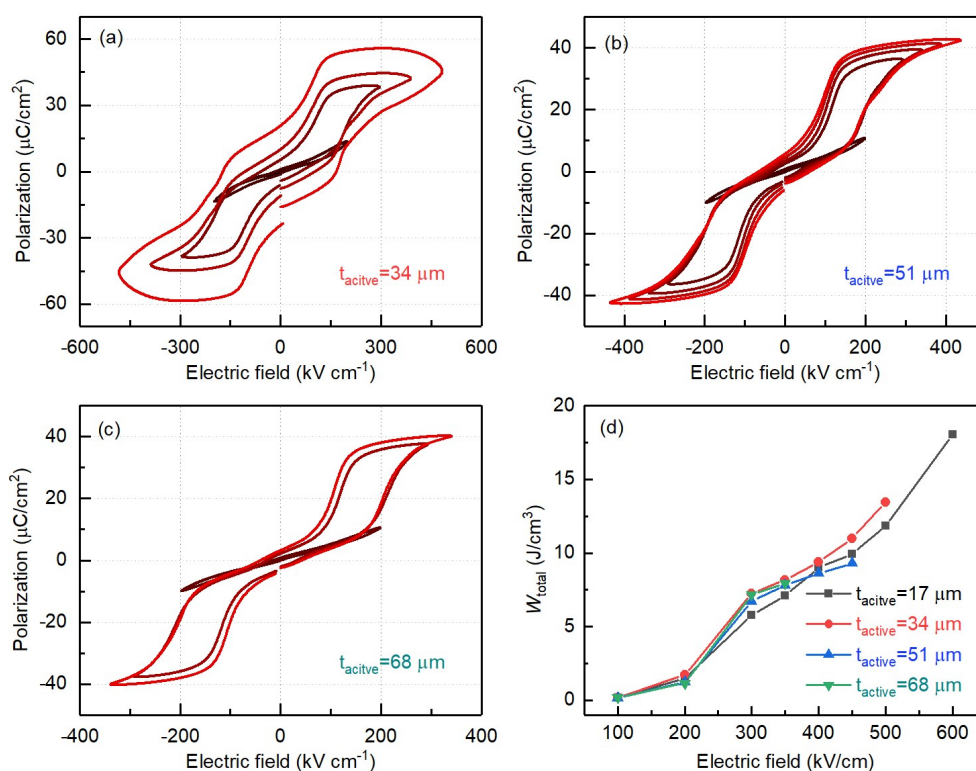

Fig s1, P-E loops for the samples at  $t_{\text{active}}=34 \mu\text{m}$  (a),  $t_{\text{active}}=51 \mu\text{m}$  (b) and  $t_{\text{active}}=68 \mu\text{m}$  (c) measured at different electric field, and the total energy-storage density for ANT multilayer capacitors with  $t_{\text{active}}$  (d).

Corresponding author: [xyy355@psu.edu](mailto:xyy355@psu.edu) (Yongke Yan)

Corresponding author: [sup103@psu.edu](mailto:sup103@psu.edu) (Shashank Priya)

These authors (Li-Feng Zhu, Lei Zhao) contributed equally to this work.

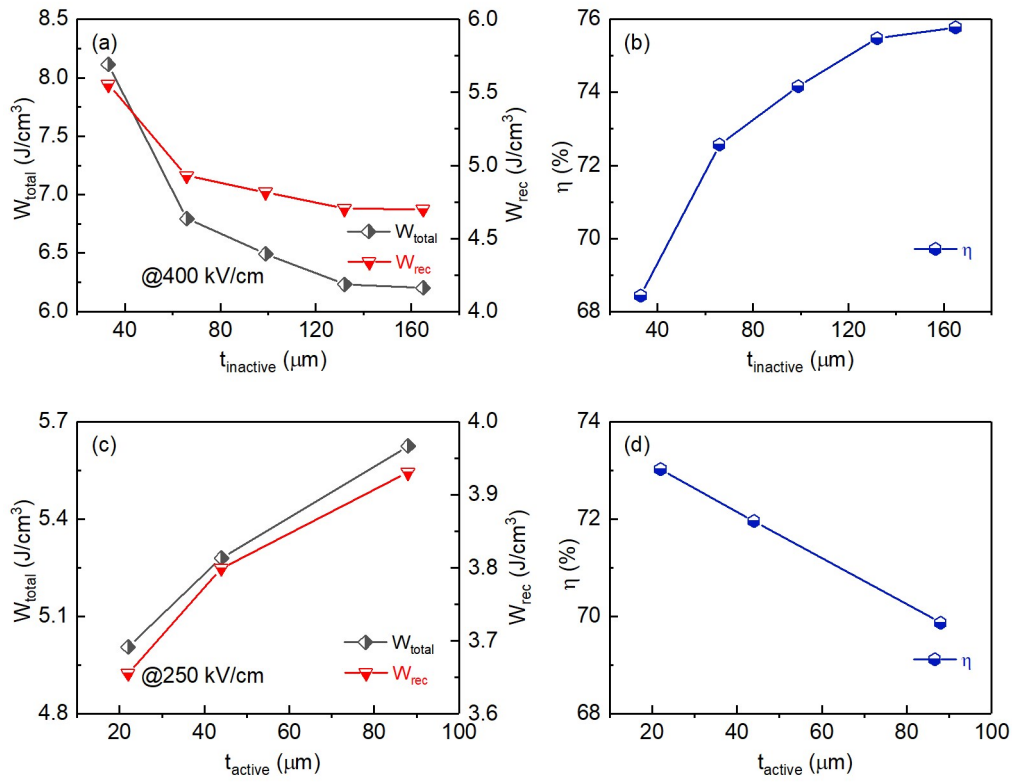

Fig s2 Variation of  $W_{total}$ , and  $W_{rec}$  (a), and  $\eta$  and average stress tensor of y component of active layer (b) as a function of  $t_{inactive}$  for ANT+Mn capacitor measured at 400 kV/cm, and variation of  $W_{total}$  and  $W_{rec}$  (c), and  $\eta$  and average stress tensor of y component of active layer (d) as a function of  $t_{active}$  for ANT+Mn capacitor measured at 250 kV/cm.

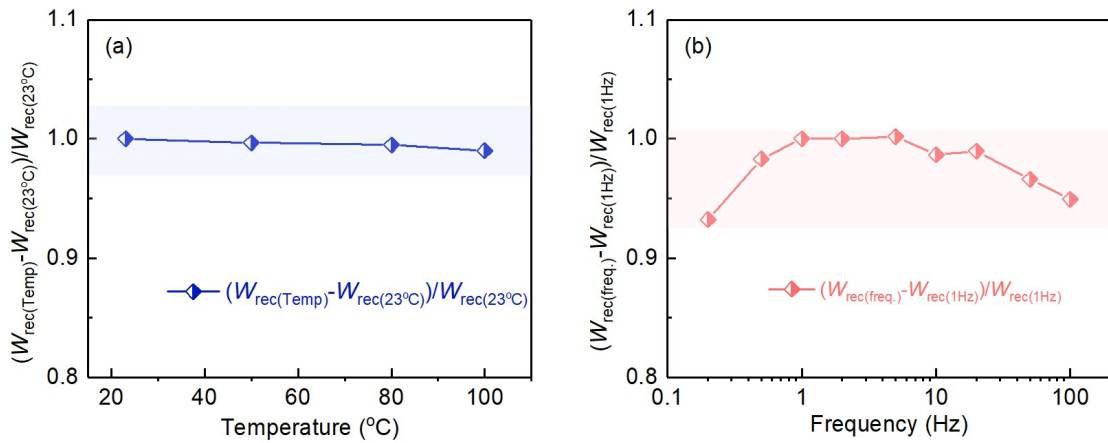

Fig.s3 Temperature dependence (a) and frequency (b) of normalized  $W_{rec}$  for ANT+Mn capacitor measured at 800 kV/cm.
